# Supplementary material for: Domestic cats (Felis catus) discriminate their names from other words
Source: PubMed Central journal article supplement (PMC6449508; doi:10.1038/s41598-019-40616-4), 2019-04-04
Supplement: 41598_2019_40616_MOESM1_ESM.pdf [file 41598_2019_40616_MOESM1_ESM.pdf]

# Domestic cats (*Felis catus*) discriminate their names from other words

Atsuko Saito\*<sup>†1,2,3</sup>, Kazutaka Shinozuka<sup>†4</sup>, Yuki Ito<sup>1</sup>, Toshikazu Hasegawa<sup>1</sup>

<sup>1</sup>Department of Cognitive and Behavioral Science, Graduate School of Arts and Sciences, the University of Tokyo, 3-8-1 Komaba, Meguro-ku, Tokyo, Japan

<sup>2</sup> Department of Childhood Education, Musashino University, 1-1-20 Shinmachi, Nishitokyo-shi, Tokyo, Japan

<sup>3</sup> Department of Psychology, Faculty of Human Sciences, Sophia University, 7-1 Kioicho, Chiyoda-ku, Tokyo, Japan

<sup>4</sup>RIKEN Center for Brain Science, 2-1 Hirosawa, Wako, Saitama, Japan

\*Corresponding author

†These authors contributed equally.

**Table S1.** Statistical analysis for behaviour score. Results of Fisher’s exact test for number of cats which showed orienting response (ear moving and/or head moving) and communicative response (vocalising and/or tail moving) in each voice presentation were shown. *P* values were adjusted with Bonferroni correction for each experiment.

| Experiment | Voice presentation | Odds ratio | 95% confidence interval | Adjusted <i>P</i> value |       |     |
|------------|--------------------|------------|-------------------------|-------------------------|-------|-----|
| 1          | Noun 1             | 0.000      | 0.000                   | 0.084                   | 0.000 | *** |
|            | Noun 2             | 0.026      | 0.000                   | 0.261                   | 0.001 | *** |
|            | Noun 3             | 0.045      | 0.001                   | 0.429                   | 0.010 | **  |
|            | Noun 4             | 0.000      | 0.000                   | 0.314                   | 0.004 | **  |
|            | Test cat’s name    | 0.000      | 0.000                   | 0.084                   | 0.000 | *** |
| 2          | Name 1             | 0.019      | 0.003                   | 0.089                   | 0.000 | *** |
|            | Name 2             | 0.019      | 0.003                   | 0.089                   | 0.000 | *** |
|            | Name 3             | 0.024      | 0.002                   | 0.125                   | 0.000 | *** |
|            | Name 4             | 0.040      | 0.008                   | 0.155                   | 0.000 | *** |
|            | Test cat’s name    | 0.165      | 0.046                   | 0.529                   | 0.006 | **  |
| 3          | Noun 1             | 0.026      | 0.002                   | 0.142                   | 0.000 | *** |
|            | Noun 2             | 0.000      | 0.000                   | 0.084                   | 0.000 | *** |
|            | Noun 3             | 0.031      | 0.001                   | 0.238                   | 0.000 | *** |
|            | Noun 4             | 0.036      | 0.003                   | 0.191                   | 0.000 | *** |
|            | Test cat’s name    | 0.000      | 0.000                   | 0.110                   | 0.000 | *** |
| 4          | Noun 1             | 0.051      | 0.011                   | 0.195                   | 0.000 | *** |
|            | Noun 2             | 0.043      | 0.009                   | 0.168                   | 0.000 | *** |
|            | Noun 3             | 0.043      | 0.009                   | 0.168                   | 0.000 | *** |
|            | Noun 4             | 0.076      | 0.019                   | 0.268                   | 0.000 | *** |
|            | Test cat’s name    | 0.082      | 0.019                   | 0.293                   | 0.000 | *** |

**Table S2.** Information on cats and their owners in Experiment 1

| <b>Cats</b>       |            |                        |                     | <b>Owners</b> |               |
|-------------------|------------|------------------------|---------------------|---------------|---------------|
| <b>ID</b>         | <b>Sex</b> | <b>Age<br/>(years)</b> | <b>Breed</b>        | <b>ID</b>     | <b>Gender</b> |
| Cr                | Female     | 2                      | mongrel             | RS            | Female        |
| Ekcn <sup>1</sup> | Female     | 1                      | Himalayan           | TM            | Female        |
| Icg               | Female     | 1                      | mongrel             | YM            | Male          |
| Knt               | Male       | 4                      | mongrel             | MN            | Male          |
| Kro               | Male       | 4                      | mongrel             | KB            | Female        |
| Krr               | Male       | 6                      | mongrel             | AR            | Female        |
| Kucn              | Male       | 10                     | mongrel             | AK            | Female        |
| Mm                | Female     | 2                      | mongrel             | YM            | Male          |
| Nk                | Female     | 1                      | American Short-hair | TM            | Female        |
| Okr               | Male       | 5                      | mongrel             | AS            | Female        |
| Rnk               | Female     | 11                     | mongrel             | YJ            | Female        |
| Sco               | Male       | 4                      | mongrel             | SZ            | Male          |
| Sm                | Female     | 4                      | mongrel             | KB            | Female        |
| Sr                | Male       | 1                      | Scottish Fold       | AT            | Female        |
| Te                | Female     | 1                      | mongrel             | RS            | Female        |
| Um                | Male       | 2                      | Scottish Fold       | AT            | Female        |

<sup>1</sup>This cat was not neutered.

**Table S3.** Information on cats and their owners in Experiment 2

| Cats              |        |             |                  | Owners |        |
|-------------------|--------|-------------|------------------|--------|--------|
| ID                | Sex    | Age (years) | Breed            | ID     | Gender |
| Ann               | Female | 8           | mongrel          | TS     | Female |
| Anr               | Male   | 10          | mongrel          | TS     | Female |
| Arcn              | Female | 2           | mongrel          | YK     | Female |
| Bicn              | Female | 2           | mongrel          | TS     | Female |
| Br                | Female | 10          | mongrel          | YA     | Female |
| Brcn              | Female | 0.5         | Devon Rex        | MO     | Female |
| Ck                | Female | 8           | mongrel          | YA     | Female |
| Cocn <sup>2</sup> | Male   | 4           | mongrel          | KY     | Female |
| Ct                | Male   | 7           | mongrel          | YK     | Female |
| Era <sup>2</sup>  | Female | 3           | mongrel          | KY     | Female |
| Fucn              | Male   | 10          | mongrel          | YA     | Female |
| Hy                | Male   | 10          | mongrel          | YA     | Female |
| Jndu              | Male   | 1           | LaPerm           | MO     | Female |
| Knk <sup>2</sup>  | Male   | 6           | Somali           | KY     | Female |
| Kr                | Male   | 5           | mongrel          | TS     | Female |
| Mc <sup>2</sup>   | Male   | 6           | Scottish Fold    | KY     | Female |
| Mg                | Female | 5           | mongrel          | YA     | Female |
| Mkn <sup>2</sup>  | Female | 5           | American Curl    | KY     | Female |
| Mkzo              | Male   | 2           | LaPerm Shorthair | MO     | Female |
| Nkkn              | Male   | 6           | mongrel          | TS     | Female |
| Nn                | Female | 9           | mongrel          | YK     | Female |
| Pugi <sup>2</sup> | Male   | 5           | Tonkinese        | KY     | Female |
| Rb <sup>2</sup>   | Female | 6           | Munchkin         | KY     | Female |
| Rck               | Female | 2           | LaPerm           | MO     | Female |
| Rk                | Female | 4           | mongrel          | TA     | Female |
| Rncn              | Female | 5           | mongrel          | YK     | Female |
| Ro                | Male   | 10          | mongrel          | TA     | Female |
| Sbcn              | Female | 5           | LaPerm           | MO     | Female |
| Sk                | Female | 2           | mongrel          | YK     | Female |
| Skr <sup>2</sup>  | Female | 3           | mongrel          | KY     | Female |
| Srtm <sup>2</sup> | Male   | 3           | mongrel          | KY     | Female |
| Tm                | Male   | 9           | mongrel          | TA     | Female |
| Uucn              | Male   | 10          | mongrel          | TA     | Female |
| YZ <sup>2</sup>   | Female | 4           | mongrel          | KY     | Female |

<sup>2</sup>These cats were from a "cat café".

**Table S4.** Information on cats and their owners in Experiment 3

| Cats              |        |             |                  | Owners |        |
|-------------------|--------|-------------|------------------|--------|--------|
| ID                | Sex    | Age (years) | Breed            | ID     | Gender |
| Ab <sup>3</sup>   | Male   | 9           | mongrel          | TA     | Female |
| Ann               | Female | 9           | mongrel          | TS     | Female |
| Anr               | Male   | 11          | mongrel          | TS     | Female |
| Bicn              | Female | 3           | mongrel          | TS     | Female |
| Br                | Female | 11          | mongrel          | TA     | Female |
| Cocn <sup>2</sup> | Male   | 4           | mongrel          | KY     | Female |
| Era <sup>2</sup>  | Female | 3           | mongrel          | KY     | Female |
| Fucn              | Male   | 11          | mongrel          | TA     | Female |
| Hy                | Male   | 11          | mongrel          | TA     | Female |
| Jg <sup>3</sup>   | Male   | 5           | mongrel          | TA     | Female |
| Jndu              | Male   | 1           | LaPerm           | MO     | Female |
| Kr                | Male   | 6           | mongrel          | TS     | Female |
| Mc <sup>2</sup>   | Male   | 6           | Scottish Fold    | KY     | Female |
| Mg                | Female | 6           | mongrel          | TA     | Female |
| Mkn <sup>2</sup>  | Female | 5           | American Curl    | KY     | Female |
| Mkzo              | Male   | 2           | LaPerm Shorthair | MO     | Female |
| Mnr <sup>3</sup>  | Female | 12          | mongrel          | TA     | Female |
| Nkkn              | Male   | 7           | mongrel          | TS     | Female |
| Pugi <sup>2</sup> | Male   | 5           | Tonkinese        | KY     | Female |
| Rb <sup>2</sup>   | Female | 6           | Munchkin         | KY     | Female |
| Rck               | Female | 3           | LaPerm           | MO     | Female |
| Rk                | Female | 5           | mongrel          | TA     | Female |
| Ro                | Male   | 11          | mongrel          | TA     | Female |
| Sbcn              | Female | 5           | LaPerm           | MO     | Female |
| Skr <sup>2</sup>  | Female | 3           | mongrel          | KY     | Female |
| Srtm <sup>2</sup> | Male   | 3           | mongrel          | KY     | Female |
| Tm                | Male   | 10          | mongrel          | TA     | Female |
| Uucn              | Male   | 11          | mongrel          | TA     | Female |
| YZ <sup>2</sup>   | Female | 4           | mongrel          | KY     | Female |

<sup>2</sup>These cats were from a "cat café".

<sup>3</sup>These cats did not participate in Experiment 2

**Table S5.** Information on cats and their owners in Experiment 4

| Cats                |        |             |                      | Owners |        |
|---------------------|--------|-------------|----------------------|--------|--------|
| ID                  | Sex    | Age (years) | Breed                | ID     | Gender |
| Ann <sup>5</sup>    | Female | 12          | mongrel              | TS     | Female |
| Bicn <sup>5</sup>   | Female | 6           | mongrel              | TS     | Female |
| Ci                  | Female | 6           | mongrel              | TS     | Female |
| Dnk                 | Male   | 8           | mongrel              | IN     | Female |
| Dr                  | Male   | 5           | mongrel              | HU     | Male   |
| Ekcn <sup>1,4</sup> | Female | 5           | Himalayan            | TM     | Female |
| Gr                  | Male   | 5           | Bengal               | JO     | Female |
| Htr                 | Female | 5           | mongrel              | MI     | Female |
| Krm                 | Female | 11          | American Short-hair  | SN     | Female |
| Kt                  | Male   | 5           | mongrel              | IT     | Female |
| Ktr                 | Male   | 5           | mongrel              | TN     | Male   |
| Micn                | Male   | 17          | mongrel              | JO     | Female |
| Mk                  | Male   | 5           | mongrel              | YY     | Female |
| Mm                  | Female | 5           | mongrel              | IT     | Female |
| Mq                  | Male   | 2           | mongrel              | HU     | Male   |
| Mtb                 | Female | 13          | Scottish Fold        | YS     | Female |
| Ngboi               | Male   | 7           | Norwegian Forest Cat | MM     | Female |
| Nk <sup>4</sup>     | Female | 5           | American Short-hair  | TM     | Female |
| Nkkn <sup>5</sup>   | Male   | 10          | mongrel              | TS     | Female |
| Nnn                 | Female | 2           | Russian Blue         | MM     | Female |
| Okr <sup>4</sup>    | Male   | 9           | mongrel              | AS     | Female |
| Rc(k) <sup>5</sup>  | Female | 5           | LaPerm               | MO     | Female |
| Rn(k) <sup>4</sup>  | Female | 15          | mongrel              | YJ     | Female |
| Ron                 | Male   | 1           | mongrel              | NK     | Female |
| Rq                  | Male   | 2           | mongrel              | KU     | Female |
| Sbcn <sup>5</sup>   | Female | 8           | LaPerm               | MO     | Female |
| Sc                  | Female | 6           | mongrel              | AA     | Female |
| Suk                 | Female | 3           | mongrel              | CA     | Female |
| Tb                  | Female | 14          | mongrel              | MI     | Female |
| Tncn                | Female | 2           | mongrel              | MOI    | Female |
| To                  | Female | 1           | mongrel              | KU     | Female |
| Uocn                | Female | 1           | mongrel              | MOI    | Female |
| Uzr                 | Male   | 8           | mongrel              | ASK    | Female |

<sup>1</sup>This cat was not neutered.

<sup>4</sup>These cats participated in Experiment 1.

<sup>5</sup>These cats participated in Experiments 2 and 3.

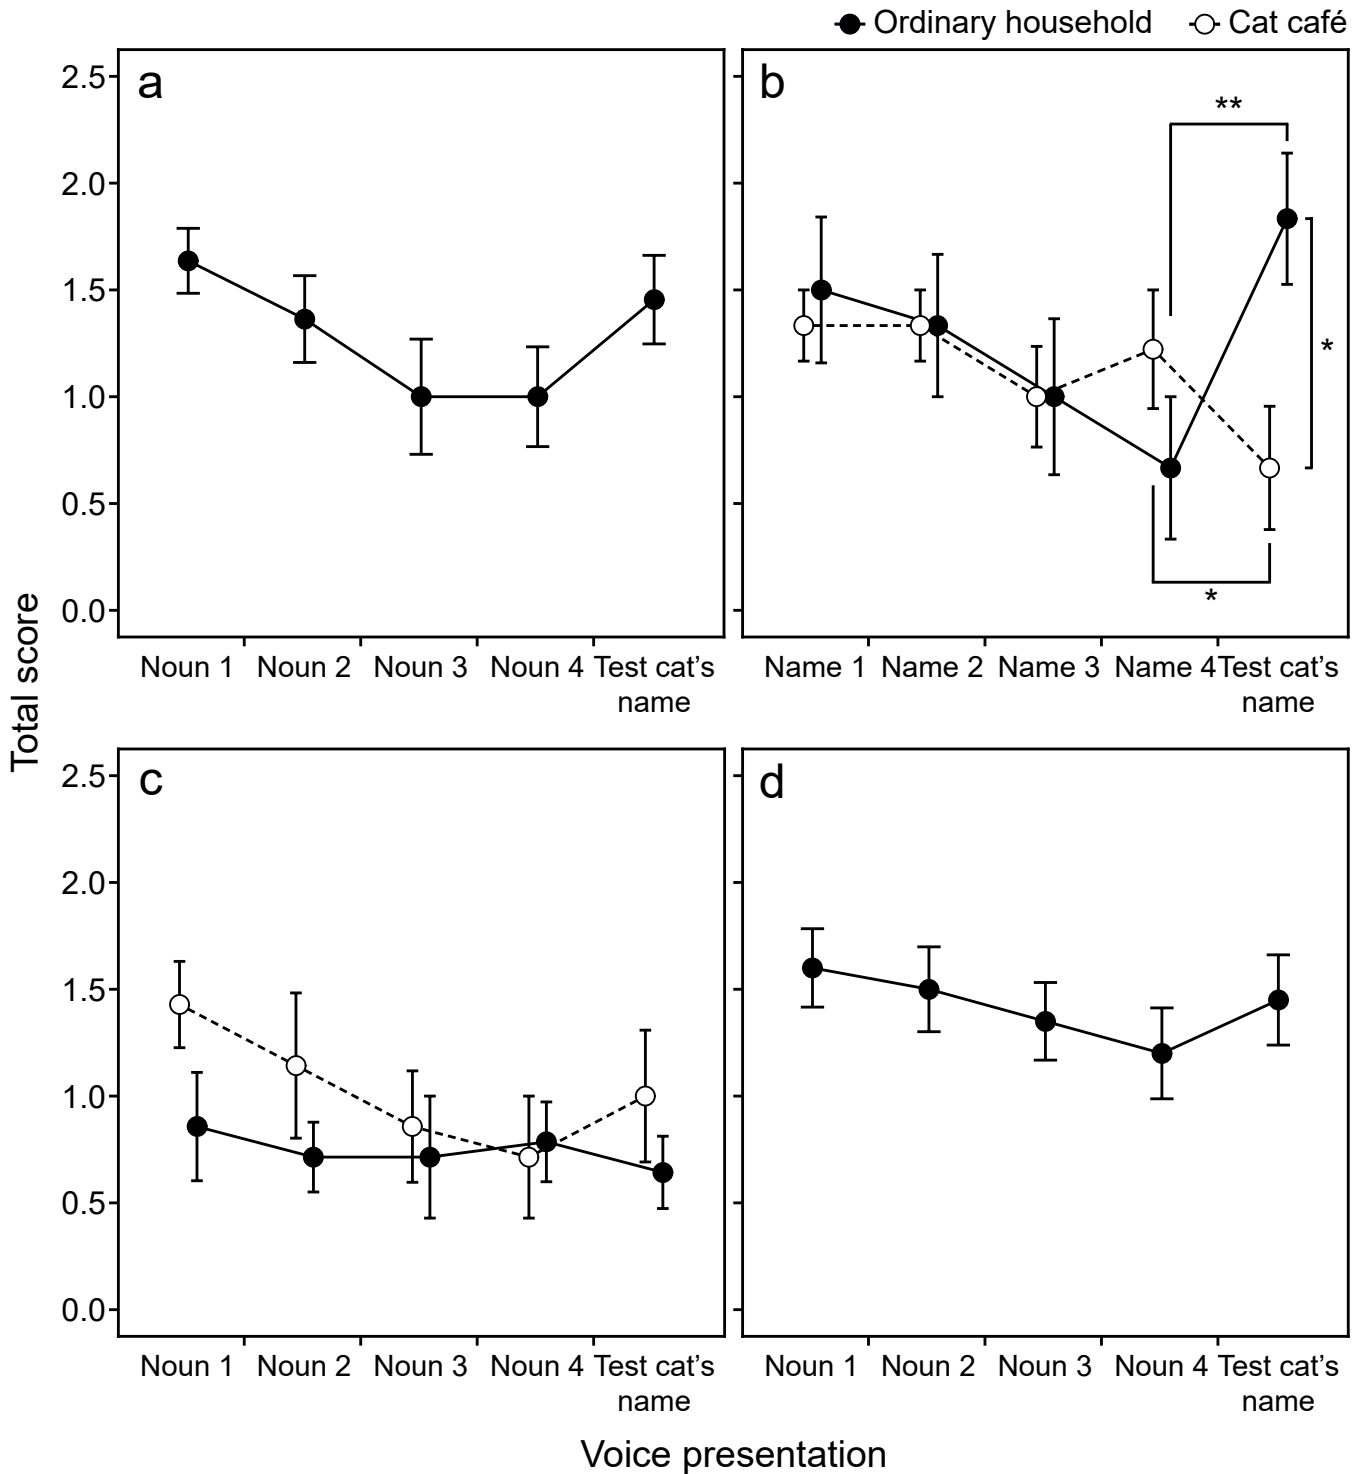

**Figure S1.** Total behaviour score in habituated cats. a) Experiment 1, b) Experiment 2, c) Experiment 3, and d) Experiment 4. In Experiment 2, significant interaction between trial and environment was observed ( $F(1, 13) = 19.67, P = 0.001$ , GLMM). Significantly increased score in own name was only observed in ordinary household cats ( $t(13) = -3.88, P = 0.002$ ). In contrast, café cats significantly decreased score ( $t(13) = 2.26, P = 0.042$ ), suggesting continuous habituation from others' name to own name. These two groups were also significantly different in own name trial ( $t(19.09) = -2.68, P = 0.015$ ). In Experiment 1, 3, and 4, no significant effect was revealed. Error bars indicate SEs. \*\* and \* indicate  $P < 0.01$  and  $P < 0.05$  respectively.
